# Supplementary material for: Critical involvement of Rho GTPase activity in the efficient transplantation of neural stem cells into the injured spinal cord
Source: PubMed Central journal article supplement (PMC2789715; doi:10.1186/1756-6606-2-37), 2009-11-28
Supplement: 1756-6606-2-37-S1.pdf [file 1756-6606-2-37-S1.pdf]

Additional file 1. The proportion of in vitro differentiation in each adenovirus infected cell

|      | control  | CdcCA    | CdcDN    | RacCA    | RacDN    | RhoCA    | RhoDN    | RacDN+RhoDN |
|------|----------|----------|----------|----------|----------|----------|----------|-------------|
| MAP2 | 19.5±1.5 | 21.0±1.8 | 20.4±1.3 | 21.2±2.7 | 20.5±1.7 | 21.8±1.0 | 22.9±2.3 | 23.7±1.7    |
| GFAP | 13.6±1.6 | 16.3±2.0 | 15.2±0.3 | 15.0±1.6 | 14.2±1.1 | 13.3±1.0 | 13.4±0.8 | 16.1±0.8    |
| RIP  | 3.2±0.3  | 2.8±0.3  | 2.9±0.3  | 3.7±0.3  | 4.2±0.5  | 3.5±0.3  | 4.6±1.5  | 4.9±0.7     |

( % of counted cells ± SEM)
